# Supplementary material for: Plant Growth-Promoting Bacteria Enhance Survival, Growth, and Nutritional Content of Sugarcane Propagated through Pre-sprouted Seedlings under Water Deficit
Source: Preprints.org preprint supplement (doi:10.20944/preprints202401.0166.v1), 2024-01-03
Supplement: Supplementary file 3 [file supplementary]

Table S1. Equations for adjusting the leaf area and total dry mass variables for growth analysis.

| **Water Regimes** | **Inoculation** | **Leaf Area (LA)** | **Shoot Dry Biomass (SDB)** |
| --- | --- | --- | --- |
| 0% | without | LA= (0.127544)[(0.0669459x) + (0.00015688x²)] | SDB= (0.0391678)[(8.244699x) + (-0.0001717886x²)] |
| with | LA= (0.138542) [(0.06910851x) + (-0.0001667687x²)] | SDB= (0.131898)[(0.07157959x) + (-0.0001433858x²)] |
| 33% | without | LA= (0.1561928) (0.06819073x) + (-0.0001658657x²) | SDB= (0.09134302) [(0.07757557x) + (-0.0001670575x²)] |
| with | LA= (0.1547024) [(0.07118981x) + (-0.000150865x²)] | SDB= (0.1362462) [(0.07315873x) + (-0.000150865x²)] |
| 66% | without | LA= (0.2150024) [(0.06975332x) + (-0.0001810158x²)] | SDB= (0.09281182) [(0.07851504x) + (-0.0001689678x²)] |
| with | LA= (0.1390258) [(0.07676631x) + (-0.0002034792x²)] | SDB= (0.1425825) [(0.07229401x) + (-0.0001474401x²)] |
| 100% | without | LA= (0.2050578) [(0.0700891x) + (-0.0001820735x²)] | SDB= (0.09886897) [(0.08210665x) +(-0.0001837812x²)] |
| with | LA= (0.1529837) [(0.08008989x) + (-0.0002172553x²)] | SDB= (0.1154779) [(0.08325987x) +(-0.0001880663x²)] |

Equations generated by Anacres software (Portes and Castro Júnior, 1991).
